# Supplementary material
Source: PubMed Central journal article supplement (PMC4681041)
Supplement: mic-161-08-1648-s001.pdf [file mic-161-08-1648-s001.pdf]

Supplemental Table 1. Detailed PMF and MS/MS data results for *C. caryae* EB and RB phosphoproteins identified in this study.

| Phosphoproteome Spot Identification |          |                                                     |             | source <sup>c</sup> | Peptide Mass Fingerprinting |               |            |            |                 |                   |               | Sequence(s) confirmed by Collision-Induced Dissociation |                                     |            |           |                              |                 |                                 |
|-------------------------------------|----------|-----------------------------------------------------|-------------|---------------------|-----------------------------|---------------|------------|------------|-----------------|-------------------|---------------|---------------------------------------------------------|-------------------------------------|------------|-----------|------------------------------|-----------------|---------------------------------|
| spot number                         | gene     | Protein function                                    | accession # | EB                  | RB                          | spectrum file | Protein MW | Protein PI | Unique Peptides | Matched/ Searched | Seq. Coverage | Protein Score                                           | Protein Score Confidence Interval % | Start seq. | stop seq. | peptide seq.                 | Total Ion Score | Total Ion Confidence Interval % |
| 1                                   | CCA00030 | FHA domain-containing protein/CdsD T3SS             | 29839798    |                     |                             | D1            | 90823.9    | 4.6        | 25              | 36/63             | 42%           | 613                                                     | 100                                 | 568        | 576       | VVNAFFTIVR                   | 420             | 100                             |
|                                     |          |                                                     |             |                     |                             |               |            |            |                 |                   |               |                                                         |                                     | 731        | 743       | SVVQEISSIPGVR                |                 |                                 |
|                                     |          |                                                     |             |                     |                             |               |            |            |                 |                   |               |                                                         |                                     | 339        | 352       | AEILSPFNVDLFR                |                 |                                 |
|                                     |          |                                                     |             |                     |                             |               |            |            |                 |                   |               |                                                         |                                     | 552        | 567       | EVPIENMDFQEDIER              |                 |                                 |
| 2                                   | CCA00030 | FHA domain-containing protein (yscD T3S structural) | 29839798    |                     |                             | D2            | 90823.9    | 4.6        | 22              | 31/67             | 39%           | 623                                                     | 100                                 | 568        | 576       | VVNAFFTIVR                   | 479             | 100                             |
|                                     |          |                                                     |             |                     |                             |               |            |            |                 |                   |               |                                                         |                                     | 731        | 743       | SVVQEISSIPGVR                |                 |                                 |
|                                     |          |                                                     |             |                     |                             |               |            |            |                 |                   |               |                                                         |                                     | 339        | 352       | AEILSPFNVDLFR                |                 |                                 |
|                                     |          |                                                     |             |                     |                             |               |            |            |                 |                   |               |                                                         |                                     | 552        | 567       | EVPIENMDFQEDIER              |                 |                                 |
| 3                                   | CCA00030 | FHA domain-containing protein (yscD T3S structural) | 29839798    |                     |                             | F1            | 90823.9    | 4.6        | 17              | 27/64             | 28%           | 303                                                     | 100                                 | 568        | 576       | VVNAFFTIVR                   | 279             | 100                             |
|                                     |          |                                                     |             |                     |                             |               |            |            |                 |                   |               |                                                         |                                     | 731        | 743       | SVVQEISSIPGVR                |                 |                                 |
|                                     |          |                                                     |             |                     |                             |               |            |            |                 |                   |               |                                                         |                                     | 339        | 352       | AEILSPFNVDLFR                |                 |                                 |
|                                     |          |                                                     |             |                     |                             |               |            |            |                 |                   |               |                                                         |                                     | 552        | 567       | EVPIENMDFQEDIER              |                 |                                 |
| 4                                   | eno      | phosphopyruvate hydratase (enolase)                 | 29840718    |                     |                             | D3            | 45424.9    | 4.5        | 12              | 19/62             | 43%           | 413                                                     | 100                                 | 1          | 12        | MLEVVISDIQAR                 | 330             | 100                             |
|                                     |          |                                                     |             |                     |                             |               |            |            |                 |                   |               |                                                         |                                     | 199        | 215       | NLATGVGDEGGFAPQLK            |                 |                                 |
|                                     |          |                                                     |             |                     |                             |               |            |            |                 |                   |               |                                                         |                                     | 262        | 276       | SVYEQVNLADLCDR               |                 |                                 |
|                                     |          |                                                     |             |                     |                             |               |            |            |                 |                   |               |                                                         |                                     | 365        | 386       | SGETEDTTIADLVAVENTGQIK       |                 |                                 |
| 5                                   | CCA00015 | hypothetical protein                                | 29839784    |                     |                             | F2            | 66979.9    | 4.8        | 21              | 30/47             | 45%           | 760                                                     | 100                                 | 58         | 65        | LSFLSSAR                     | 679             | 100                             |
|                                     |          |                                                     |             |                     |                             |               |            |            |                 |                   |               |                                                         |                                     | 590        | 603       | FIAQLENEFVQGSK               |                 |                                 |
|                                     |          |                                                     |             |                     |                             |               |            |            |                 |                   |               |                                                         |                                     | 13         | 31        | NIAPADLTLGMOASAANR           |                 |                                 |
|                                     |          |                                                     |             |                     |                             |               |            |            |                 |                   |               |                                                         |                                     | 337        | 357       | VSMILLTDVDSNTAAIMQGF         |                 |                                 |
| 7                                   | dnaK     | molecular chaperone DnaK                            | 29840008    |                     |                             | F3            | 71431.9    | 5.1        | 33              | 49/65             | 58%           | 573                                                     | 100                                 | 463        | 484       | SVADLSAGVGYQSLNDVYSR         | 409             | 100                             |
|                                     |          |                                                     |             |                     |                             |               |            |            |                 |                   |               |                                                         |                                     | 455        | 465       | FDLTDIPPAFR                  |                 |                                 |
|                                     |          |                                                     |             |                     |                             |               |            |            |                 |                   |               |                                                         |                                     | 451        | 465       | EIGRDLTDIPPAFR               |                 |                                 |
|                                     |          |                                                     |             |                     |                             |               |            |            |                 |                   |               |                                                         |                                     | 327        | 343       | LSASDIDVLLVGGMSR             |                 |                                 |
| 8                                   | proS     | probi-1RNA synthetase                               | 29840011    |                     |                             | F4            | 65839.1    | 5.3        | 30              | 36/70             | 63%           | 462                                                     | 100                                 | 126        | 154       | MKETAAYLGEFVTEAVHVPAYFVDSQR  | 354             | 100                             |
|                                     |          |                                                     |             |                     |                             |               |            |            |                 |                   |               |                                                         |                                     | 141        | 148       | FRDEIRPR                     |                 |                                 |
|                                     |          |                                                     |             |                     |                             |               |            |            |                 |                   |               |                                                         |                                     | 38         | 48        | GIVTYTFLWR                   |                 |                                 |
|                                     |          |                                                     |             |                     |                             |               |            |            |                 |                   |               |                                                         |                                     | 535        | 547       | TFQNSGVLEESR                 |                 |                                 |
| 9                                   | groEL    | chaperonin GroEL                                    | 29840401    |                     |                             | C2            | 58118.4    | 5.2        | 19              | 25/68             | 52%           | 513                                                     | 100                                 | 335        | 353       | GFIGPLNCPHELVADETR           | 474             | 100                             |
|                                     |          |                                                     |             |                     |                             |               |            |            |                 |                   |               |                                                         |                                     | 463        | 474       | EGAHICQVLSR                  |                 |                                 |
|                                     |          |                                                     |             |                     |                             |               |            |            |                 |                   |               |                                                         |                                     | 182        | 197       | GFETVLDVVEGMFNFR             |                 |                                 |
|                                     |          |                                                     |             |                     |                             |               |            |            |                 |                   |               |                                                         |                                     | 85         | 105       | AGDGTATVLAAYNSE              |                 |                                 |
| 11                                  | sucC     | succinyl-CoA synthetase subunit beta                | 29840541    |                     |                             | C4            | 42042.1    | 5.0        | 17              | 25/60             | 46%           | 495                                                     | 100                                 | 155        | 161       | LYNVQIR                      | 428             | 100                             |
|                                     |          |                                                     |             |                     |                             |               |            |            |                 |                   |               |                                                         |                                     | 216        | 225       | ITIDNLYR                     |                 |                                 |
|                                     |          |                                                     |             |                     |                             |               |            |            |                 |                   |               |                                                         |                                     | 229        | 241       | LEVLYDPSQENVR                |                 |                                 |
|                                     |          |                                                     |             |                     |                             |               |            |            |                 |                   |               |                                                         |                                     | 10         | 23        | DLLVSYDIAIPYR                |                 |                                 |
| 12                                  | prfB     | peptide chain release factor 2                      | 29839933    |                     |                             | C5            | 38678      | 5.1        | 13              | 14/70             | 43%           | 77                                                      | 91                                  | 128        | 154       | AGGVDEEVAQKVPDQLLTVPLTPFAR   | 279             | 100                             |
|                                     |          |                                                     |             |                     |                             |               |            |            |                 |                   |               |                                                         |                                     | 377        | 390       | ELNIPILCSQLSR                |                 |                                 |
|                                     |          |                                                     |             |                     |                             |               |            |            |                 |                   |               |                                                         |                                     | 407        | 423       | ESGSEQSDSLVMFLLR             |                 |                                 |
|                                     |          |                                                     |             |                     |                             |               |            |            |                 |                   |               |                                                         |                                     | 101        | 109       | IHLLAPEGR                    |                 |                                 |
| 16                                  | dnaB     | replicative DNA helicase                            | 29839892    |                     |                             | C6            | 53017.5    | 5.9        | 21              | 31/70             | 56%           | 336                                                     | 100                                 | 36         | 43        | LSPLTYWR                     | 319             | 100                             |
|                                     |          |                                                     |             |                     |                             |               |            |            |                 |                   |               |                                                         |                                     | 90         | 100       | TYFYHGVLDQR                  |                 |                                 |
|                                     |          |                                                     |             |                     |                             |               |            |            |                 |                   |               |                                                         |                                     | 110        | 124       | EGSQVWYQGTADAIR              |                 |                                 |
|                                     |          |                                                     |             |                     |                             |               |            |            |                 |                   |               |                                                         |                                     | 1          | 20        | MIENDFQGSYSPVQASHFYR         |                 |                                 |
| 17                                  | glgC     | glucose-1-phosphate adenylyltransferase             | 29839901    |                     |                             | D4            | 50082.2    | 5.9        | 24              | 34/69             | 59%           | 543                                                     | 100                                 | 285        | 297       | AGYTPSVFTLPR                 | 546             | 100                             |
|                                     |          |                                                     |             |                     |                             |               |            |            |                 |                   |               |                                                         |                                     | 120        | 133       | GPLYDVNETYPVFR               |                 |                                 |
|                                     |          |                                                     |             |                     |                             |               |            |            |                 |                   |               |                                                         |                                     | 237        | 251       | LNAAYVGTAEVYFR               |                 |                                 |
|                                     |          |                                                     |             |                     |                             |               |            |            |                 |                   |               |                                                         |                                     | 187        | 202       | NAEEDVNVIALIGER              |                 |                                 |
| 18                                  | CCA00035 | T3SS ATPase CdsN                                    | 29839803    |                     |                             | C7            | 48202.4    | 5.5        | 23              | 36/70             | 63%           | 640                                                     | 100                                 | 106        | 133       | VNLGEGPIDTELKGLVDVNETYPVFR   | 385             | 100                             |
|                                     |          |                                                     |             |                     |                             |               |            |            |                 |                   |               |                                                         |                                     | 112        | 119       | VLLLENLR                     |                 |                                 |
|                                     |          |                                                     |             |                     |                             |               |            |            |                 |                   |               |                                                         |                                     | 193        | 203       | RPFTAILGGAK                  |                 |                                 |
|                                     |          |                                                     |             |                     |                             |               |            |            |                 |                   |               |                                                         |                                     | 156        | 169       | HASVYHVPQAFPGR               |                 |                                 |
| 19                                  | pgk      | phosphoglycerate kinase                             | 29839829    |                     |                             | D5            | 43231.5    | 5.7        | 18              | 24/52             | 57%           | 561                                                     | 100                                 | 238        | 253       | SVGNSLVEESGIELAR             | 265             | 100                             |
|                                     |          |                                                     |             |                     |                             |               |            |            |                 |                   |               |                                                         |                                     | 155        | 169       | KHASVYHVPQAFPGR              |                 |                                 |
|                                     |          |                                                     |             |                     |                             |               |            |            |                 |                   |               |                                                         |                                     | 112        | 119       | VLLLENLR                     |                 |                                 |
|                                     |          |                                                     |             |                     |                             |               |            |            |                 |                   |               |                                                         |                                     | 193        | 203       | RPFTAILGGAK                  |                 |                                 |
| 20                                  | pgk      | phosphoglycerate kinase                             | 29839829    |                     |                             | C8            | 43231.5    | 5.7        | 17              | 23/70             | 51%           | 314                                                     | 100                                 | 156        | 169       | HASVYHVPQAFPGR               | 265             | 100                             |
|                                     |          |                                                     |             |                     |                             |               |            |            |                 |                   |               |                                                         |                                     | 238        | 253       | SVGNSLVEESGIELAR             |                 |                                 |
|                                     |          |                                                     |             |                     |                             |               |            |            |                 |                   |               |                                                         |                                     | 112        | 119       | VLLLENLR                     |                 |                                 |
|                                     |          |                                                     |             |                     |                             |               |            |            |                 |                   |               |                                                         |                                     | 193        | 203       | RPFTAILGGAK                  |                 |                                 |
| 21                                  | tuf      | elongation factor Tu                                | 29840456    |                     |                             | C9            | 43199.1    | 5.4        | 20              | 30/68             | 55%           | 465                                                     | 100                                 | 265        | 280       | ELPEQAGENVGLLLR              | 390             | 100                             |
|                                     |          |                                                     |             |                     |                             |               |            |            |                 |                   |               |                                                         |                                     | 60         | 75        | GITINASHVEYETPNR             |                 |                                 |
|                                     |          |                                                     |             |                     |                             |               |            |            |                 |                   |               |                                                         |                                     | 320        | 334       | HKPFTGYRPFQFFR               |                 |                                 |
|                                     |          |                                                     |             |                     |                             |               |            |            |                 |                   |               |                                                         |                                     | 206        | 224       | EVDKFLMPEDVFSISGR            |                 |                                 |
| 26                                  | CCA00041 | ATP:guanoide phosphotransferase                     | 29839809    |                     |                             | F5            | 39938.7    | 5.5        | 9               | 11/55             | 30%           | 181                                                     | 100                                 | 23         | 33        | TWPITFSLSR                   | 157             | 100                             |
|                                     |          |                                                     |             |                     |                             |               |            |            |                 |                   |               |                                                         |                                     | 223        | 237       | YSLGLTEEQHLSLR               |                 |                                 |
|                                     |          |                                                     |             |                     |                             |               |            |            |                 |                   |               |                                                         |                                     | 44         | 55        | VNQLVAPTSGR                  |                 |                                 |
|                                     |          |                                                     |             |                     |                             |               |            |            |                 |                   |               |                                                         |                                     | 213        | 225       | VNAYIEGDEIVYR                |                 |                                 |
| 28                                  | sucB     | dihydroloamide acetyltransferase                    | 29840183    |                     |                             | F6            | 40027.8    | 5.1        | 15              | 23/50             | 52%           | 603                                                     | 100                                 | 56         | 74        | IWVSSEGDVVAVGGGVAK           | 535             | 100                             |
|                                     |          |                                                     |             |                     |                             |               |            |            |                 |                   |               |                                                         |                                     | 75         | 105       | IYDANEAVPESAIENISSVDAEHCIFPR |                 |                                 |
|                                     |          |                                                     |             |                     |                             |               |            |            |                 |                   |               |                                                         |                                     | 80         | 89        | ALNIPVLSR                    |                 |                                 |
|                                     |          |                                                     |             |                     |                             |               |            |            |                 |                   |               |                                                         |                                     | 107        | 120       | RVEEFPNEVEWEEK               |                 |                                 |
| 30                                  | CCA00732 | DadA family oxidoreductase                          | 29840489    |                     |                             | C10           | 37818.5    | 5.3        | 13              | 19/69             | 43%           | 205                                                     | 100                                 | 90         | 106       | GHRPAVDDEQAEIFMK             | 177             | 100                             |
|                                     |          |                                                     |             |                     |                             |               |            |            |                 |                   |               |                                                         |                                     | 57         | 79        | ASKPPLADLGTSTHGLTEASK        |                 |                                 |
|                                     |          |                                                     |             |                     |                             |               |            |            |                 |                   |               |                                                         |                                     | 199        | 206       | LPSELFSR                     |                 |                                 |
|                                     |          |                                                     |             |                     |                             |               |            |            |                 |                   |               |                                                         |                                     | 12         | 21        | TARPPVWFLR                   |                 |                                 |
| 31                                  | hemE     | uroporphyrinogen decarboxylase                      | 29840635    |                     |                             | F7            | 37150.3    | 5.5        | 12              | 17/70             | 48%           | 293                                                     | 100                                 | 199        | 206       | LPSELFSR                     | 264             | 100                             |
|                                     |          |                                                     |             |                     |                             |               |            |            |                 |                   |               |                                                         |                                     | 12         | 21        | TARPPVWFLR                   |                 |                                 |





Supplemental Table 2. Expanded analysis of *C. caviae* phosphoprotein homologs across *Chlamydia* species.

| <i>C. caviae</i> GPIC |               |                                                            | Protein Homologs |                     |                       |                                |                        |                              |                       |                                 |                |                                 |            |                          |            |                         |            |                         |            |                           |            |                                                |            |
|-----------------------|---------------|------------------------------------------------------------|------------------|---------------------|-----------------------|--------------------------------|------------------------|------------------------------|-----------------------|---------------------------------|----------------|---------------------------------|------------|--------------------------|------------|-------------------------|------------|-------------------------|------------|---------------------------|------------|------------------------------------------------|------------|
| spot number           | gene          | Phosphoproteome Spot Identification                        | Protein acc      | source <sup>a</sup> |                       | <i>C. trachomatis</i> A/Har-13 |                        | <i>C. trachomatis</i> B/Jali |                       | <i>C. trachomatis</i> D/UW-3/CX |                | <i>C. trachomatis</i> L2 434/Bu |            | <i>C. muridarum</i> Nigg |            | <i>C. felis</i> Fe/C-56 |            | <i>C. abortus</i> S26/3 |            | <i>C. pneumoniae</i> AR39 |            | <i>Candidatus</i> <i>proteochlamydia</i> UWE25 |            |
|                       |               |                                                            |                  | EB                  | RB                    | accession #                    | % identity             | accession #                  | % identity            | accession #                     | % identity     | accession #                     | % identity | accession #              | % identity | accession #             | % identity | accession #             | % identity | accession #               | % identity | accession #                                    | % identity |
| 1, 2, 3               | CCA00030      | FHA domain-containing protein/CdsD T3SS                    | 29839798         |                     | 76789404              | 58                             | 237803094              | 58                           | 15605397              | 58                              | 166154006      | 58                              | 15834660   | 58                       | 89898782   | 79                      | 62184678   | 83                      | 16752328   | 63                        | 46447025   | 36                                             |            |
| 4                     | <i>eno</i>    | phosphopyruvate hydratase (enolase)                        | 29840718         |                     | 76789324              | 79                             | 237803016              | 79                           | 15605316              | 79                              | 166154802      | 80                              | 15835490   | 81                       | 89898758   | 91                      | 62185532   | 93                      | 16752240   | 77                        | 46445777   | 58                                             |            |
| 5                     | CCA00015      | hypothetical protein                                       | 29839784         |                     | 76789361              | 40                             | 237803051              | 39                           | 15605353              | 39                              | 166154837      | 39                              | 270285711  | 35                       | 89898798   | 76                      | 62184662   | 77                      | 16752312   | 44                        |            | <1e-07                                         |            |
| 7                     | <i>dnaK</i>   | molecular chaperone DnaK                                   | 29840008         |                     | 76789127              | 89                             | 237802821              | 89                           | 15605121              | 89                              | 166154607      | 89                              | 270285464  | 89                       | 89898572   | 94                      | 26006347   | 96                      | 16752540   | 89                        | 46447133   | 71                                             |            |
| 8                     | <i>proS</i>   | poly(r)-RNA synthetase                                     | 29840011         |                     | 76789124              | 72                             | 237802818              | 72                           | 15605118              | 72                              | 166154604      | 72                              | 15835287   | 73                       | 89898569   | 90                      | 62184882   | 88                      | 16752543   | 75                        |            | <1e-07                                         |            |
| 9                     | <i>groEL</i>  | chaperonin GroEL                                           | 29840401         |                     | 76788825              | 93                             | 237802541              | 93                           | 15604829              | 93                              | 166154331      | 93                              | 15835005   | 93                       | 89898172   | 98                      | 62185227   | 97                      | 16752909   | 94                        | 46446814   | 73                                             |            |
| 11                    | <i>sucC</i>   | succinyl-CoA synthetase subunit beta                       | 29840541         |                     | 76789566              | 69                             | 237803253              | 69                           | 15605556              | 69                              | 166154165      | 69                              | 15834828   | 69                       | 89898036   | 90                      | 62185364   | 90                      | 16752058   | 74                        | 46446932   | 45                                             |            |
| 12                    | <i>prfB</i>   | peptide chain release factor 2                             | 29839933         |                     | 76789195              | 74                             | 237802887              | 74                           | 15605186              | 74                              | 166154673      | 74                              | 270285531  | 82                       | 89898648   | 90                      | 62184808   | 89                      | 16752362   | 81                        | 46446965   | 56                                             |            |
| 16                    | <i>dnaB</i>   | replicative DNA helicase                                   | 29839892         |                     | 76789234              | 76                             | 237802926              | 76                           | 15605226              | 77                              | 166154712      | 76                              | 15835398   | 76                       | 89898689   | 96                      | 62184768   | 95                      | 16752424   | 83                        | 46447444   | 62                                             |            |
| 17                    | <i>glgC</i>   | glucose-1-phosphate adenylyltransferase                    | 29839901         |                     | 76789226              | 73                             | 237802917              | 73                           | 15605217              | 73                              | 166154703      | 73                              | 15835390   | 73                       | 89898680   | 92                      | 62184777   | 90                      | 16752433   | 75                        | 46445743   | 63                                             |            |
| 18                    | CCA00035      | T3SS system ATPase (CdsN)                                  | 29839803         |                     | 76789409              | 92                             | 237803099              | 92                           | 15605402              | 92                              | 166154011      | 91                              | 15834665   | 92                       | 89898777   | 97                      | 62184683   | 98                      | 16752333   | 96                        | 46447031   | 69                                             |            |
| 19, 20                | <i>pgk</i>    | phosphoglycerate kinase                                    | 29839829         |                     | 76789433              | 76                             | 237803123              | 76                           | 15605426              | 76                              | 166154035      | 77                              | 15834690   | 78                       | 89898750   | 91                      | 62184709   | 92                      | 16752362   | 81                        | 46445873   | 49                                             |            |
| 21                    | <i>tuf</i>    | elongation factor Tu                                       | 29840456         |                     | 76789044              | 94                             | 237802745              | 94                           | 15605043              | 94                              | 166154532      | 94                              | 161579044  | 94                       | 89898120   | 98                      | 62185281   | 98                      | 16752970   | 92                        | 46446229   | 74                                             |            |
| 26                    | CCA00041      | ATP:guanine phosphotransferase                             | 29839809         |                     | 76789415              | 52                             | 237803105              | 52                           | 15605408              | 52                              | 166154017      | 52                              | 15834671   | 52                       | 89898771   | 86                      | 62184689   | 89                      | 16752339   | 65                        | 46447508   | 32                                             |            |
| 28                    | <i>sucB</i>   | dihydrolipoamide acetyltransferase                         | 29840183         |                     | 76788768              | 68                             | 237802490              | 68                           | 15604774              | 68                              | 166154276      | 68                              | 15834945   | 69                       | 89898393   | 87                      | 62185036   | 88                      | 16752033   | 74                        | 46446723   | 46                                             |            |
| 30                    | CCA00732      | DadA family oxidoreductase                                 | 29840489         |                     | 76789105              | 71                             | 237802799              | 71                           | 15605099              | 71                              | 166154585      | 71                              | 15835269   | 72                       | 89898091   | 89                      | 62185312   | 89                      | 16751995   | 78                        | 46447403   | 35                                             |            |
| 31                    | <i>hemE</i>   | uroporphyrinogen decarboxylase                             | 29840635         |                     | 76789488              | 69                             | 237803177              | 69                           | 15605480              | 69                              | 166154089      | 69                              | 15834747   | 66                       | 89897945   | 85                      | 62185447   | 86                      | 16752146   | 67                        | 46447147   | 31                                             |            |
| 32                    | <i>ompA</i>   | major outer membrane protein, porin (MOMP)                 | 29839815         |                     | 76789421              | 68                             | 237803111              | 66                           | 15605414              | 66                              | 166154023      | 65                              | 15834677   | 69                       | 89898765   | 84                      | 62184695   | 86                      | 16752345   | 74                        |            | <1e-07                                         |            |
| 33, 35                | CCA00005      | aromatic amino acid aminotransferase                       | 29839774         |                     | 76789376              | 59                             | 237803066              | 59                           | 15605368              | 60                              | 166153978      | 60                              | 15834630   | 57                       | 89898808   | 87                      | 62184652   | 86                      | 16752301   | 66                        | 161611311  | 36                                             |            |
| 38                    | <i>gap</i>    | glyceraldehyde-3-phosphate dehydrogenase                   | 29839884         |                     | 76789242              | 78                             | 237802934              | 78                           | 15605234              | 78                              | 166154720      | 79                              | 15835406   | 78                       | 89898697   | 95                      | 62184760   | 92                      | 16752416   | 81                        | 46446069   | 63                                             |            |
| 41                    | <i>tat</i>    | transaldolase B                                            | 29840447         |                     | 76789035              | 85                             | 237802736              | 86                           | 15605034              | 86                              | 166154523      | 86                              | 15835204   | 84                       | 89898129   | 95                      | 62185272   | 94                      | 16752962   | 85                        | 46447325   | 49                                             |            |
| 47, 48, 52            | <i>pyrH</i>   | uridylyl kinase                                            | 29839812         |                     | 76789418              | 70                             | 237803108              | 70                           | 15605411              | 70                              | 166154020      | 70                              | 15834674   | 71                       | 89898768   | 91                      | 62184692   | 92                      | 16752342   | 82                        | 46447511   | 42                                             |            |
| 49                    | CCA00083      | hypothetical protein                                       | 29839851         |                     | 76789275              | 85                             | 237802967              | 85                           | 15605267              | 85                              | 166154753      | 85                              | 15835439   | 84                       | 89898730   | 94                      | 62184727   | 96                      | 16752382   | 85                        | 46445867   | 51                                             |            |
| 50                    | <i>tpiA</i>   | triosephosphate isomerase                                  | 29840073         |                     | 76789052              | 54                             | 237802751              | 55                           | 15605051              | 55                              | 166154538      | 55                              | 15835221   | 54                       | 89898502   | 94                      | 62184937   | 81                      | 16753052   | 57                        | 46446435   | 43                                             |            |
| 56                    | <i>def</i>    | peptide deformylase                                        | 29840076         |                     | 76789079              | 64                             | 237802778              | 64                           | 15605076              | 64                              | 166154565      | 64                              | 15835247   | 65                       | 89898499   | 96                      | 62184939   | 84                      | 16753049   | 84                        | 46446437   | 45                                             |            |
| 57                    | <i>adk</i>    | adenylate kinase                                           | 29840294         |                     | 76788843              | 50                             | 237802558              | 50                           | 15604847              | 50                              | 166154349      | 50                              | 15835023   | 49                       | 89898281   | 76                      | 62185147   | 76                      | 16752794   | 56                        | 46446675   | 37                                             |            |
| 59                    | CCA00595      | hypothetical protein                                       | 29840353         |                     | 76788903              | 61                             | 237802605              | 61                           | 15604901              | 61                              | 166154391      | 61                              | 15835071   | 61                       | 89898216   | 89                      | 62185184   | 89                      | 16753081   | 70                        | 46446515   | 16                                             |            |
| 60                    | <i>axxB</i>   | arginine decarboxylase                                     | 29840487         |                     | 76789101 <sup>§</sup> | 89                             | 237802798 <sup>§</sup> | 89                           | 15605097 <sup>§</sup> | 90                              | auxB truncated | <1e-07                          | 15835267   | 90                       | 89898093   | 95                      | 62185310   | 96                      | 16751993   | 90                        |            | <1e-07                                         |            |
| 61                    | <i>thiE</i>   | thiamine-phosphate pyrophosphorylase                       | 29839970         |                     |                       | <1e-07                         | <1e-07                 | <1e-07                       | <1e-07                | <1e-07                          | <1e-07         | <1e-07                          | <1e-07     | <1e-07                   | <1e-07     | <1e-07                  | <1e-07     | <1e-07                  | <1e-07     | <1e-07                    | <1e-07     | <1e-07                                         | <1e-07     |
| 62                    | <i>ssb</i>    | single-strand DNA-binding protein                          | 29840172         |                     | 76788757              | 64                             | 237802479              | 64                           | 15604763              | 64                              | 166154265      | 64                              | 15834934   | 66                       | 89898405   | 91                      | 62185025   | 88                      | 16752652   | 82                        | 46446738   | 29                                             |            |
| 63                    | CCA00630      | hypothetical protein                                       | 29840388         |                     | 76788933              | 61                             | 237802634              | 61                           | 15604931              | 60                              | 166154421      | 61                              | 15835101   | 66                       | 89898180   | 91                      | 62185218   | 93                      | 16752904   | 85                        | 46447389   | 55                                             |            |
| 64                    | <i>rsbV_2</i> | anti-anti-sigma factor                                     | 29840616         |                     | 76789507              | 46                             | 237803195              | 46                           | 15605498              | 46                              | 166154107      | 46                              | 15834766   | 48                       | 89897964   | 84                      | 62185428   | 86                      | 16752127   | 51                        | 46446878   | 38                                             |            |
| 65                    | CCA00330      | hypothetical protein                                       | 29840094         |                     | 76789060              | 75                             | 237802759              | 75                           | 15605058              | 75                              | 166154546      | 75                              | 15835229   | 75                       | 89898479   | 93                      | 62184956   | 89                      | 16753005   | 85                        | 46446111   | 31                                             |            |
| 66                    | <i>rsbV_1</i> | anti-anti-sigma factor                                     | 29840000         |                     | 76789157              | 75                             | 237802851              | 75                           | 15605151              | 75                              | 166154637      | 75                              | 15835322   | 74                       | 89898580   | 92                      | 62184871   | 96                      | 16752532   | 80                        | 46446878   | 33                                             |            |
| 5                     | CCA00282      | polymorphic outer membrane protein G family protein (PmpG) | 29840049         |                     | 76789619              | 29                             | 237803305              | 29                           | 15605607              | 29                              | 166154217      | 29                              | 15834883   | 27                       | 89898532   | 70                      | 62185212   | 53                      | 16752590   | 43                        |            | <1e-07                                         |            |
| 10                    | <i>fusA</i>   | elongation factor G                                        | 29839959         |                     | 76789171              | 92                             | 237802864              | 92                           | 15605164              | 92                              | 166154650      | 92                              | 15835336   | 92                       | 89898622   | 96                      | 62184832   | 96                      | 16752491   | 93                        | 46445841   | 74                                             |            |
| 15                    | <i>thrS</i>   | threonyl-tRNA synthetase                                   | 29840712         |                     | 76789318              | 79                             | 237803101              | 79                           | 15605310              | 79                              | 166154796      | 78                              | 15835484   | 78                       | 89897864   | 90                      | 62185526   | 89                      | 16752234   | 79                        | 46447649   | 56                                             |            |
| 20                    | <i>tkt</i>    | transketolase                                              | 29840632         |                     | 76789492              | 75                             | 237803180              | 75                           | 15605483              | 76                              | 166154092      | 76                              | 15834751   | 75                       | 89897948   | 92                      | 62185444   | 93                      | 16752143   | 77                        | 46447148   | 56                                             |            |
| 26                    | <i>tig</i>    | trigger factor                                             | 29840674         |                     | 76789447              | 63                             | 237803137              | 63                           | 15605440              | 63                              | 166154049      | 63                              | 15834705   | 63                       | 89897902   | 92                      | 62185489   | 90                      | 16752191   | 72                        | 46447009   | 22                                             |            |
| 28, 29                | <i>atpB</i>   | V-type ATP synthase subunit B                              | 29840441         |                     | 76789029              | 89                             | 237802730              | 89                           | 15605028              | 89                              | 166154517      | 89                              | 15835198   | 89                       | 89898135   | 97                      | 62185266   | 97                      | 16752959   | 90                        | 46447313   | 68                                             |            |
| 52                    | <i>ispH</i>   | 4-hydroxy-3-methylbut-2-enyl diphosphate reductase         | 29840501         |                     | 76789606              | 70                             | 237803293              | 70                           | 15605595              | 70                              | 166154205      | 70                              | 15834869   | 68                       | 89898079   | 92                      | 62185324   | 93                      | 16752009   | 73                        | 46446712   | 60                                             |            |
| 53                    | CCA00220      | hypothetical protein, putative Zn-ribon                    | 29839987         |                     | 76789129              | 81                             | 237802823              | 81                           | 15605123              | 81                              | 166154609      | 81                              | 15835292   | 79                       | 89898594   | 96                      | 62184859   | 95                      | 16752517   | 86                        | 46446080   | 54                                             |            |

<sup>a</sup>Black boxes indicate the phosphoprotein was only present in EB or RB samples, respectively. Gray boxes indicate presence of the phosphoprotein in EB and RB samples.

<sup>b</sup>*Chlamydia pneumoniae* carries a putative frameshift mutation in this gene and is not annotated *aprB* in all *C. pneumoniae* strains.

<sup>c</sup>The *axxB* gene in these strain carry a missense mutation (G115R) that inactivates the protein. Bliven et al. FEMS Micro Lett. 337(2) 2012.
